# Supplementary material for: CEBPD Potentiates the Macrophage Inflammatory Response but CEBPD Knock-Out Macrophages Fail to Identify CEBPD-Dependent Pro-Inflammatory Transcriptional Programs
Source: MDPI journal article supplement (doi:10.3390/cells10092233), 2021-08-28
Supplement: s1 [file s1]

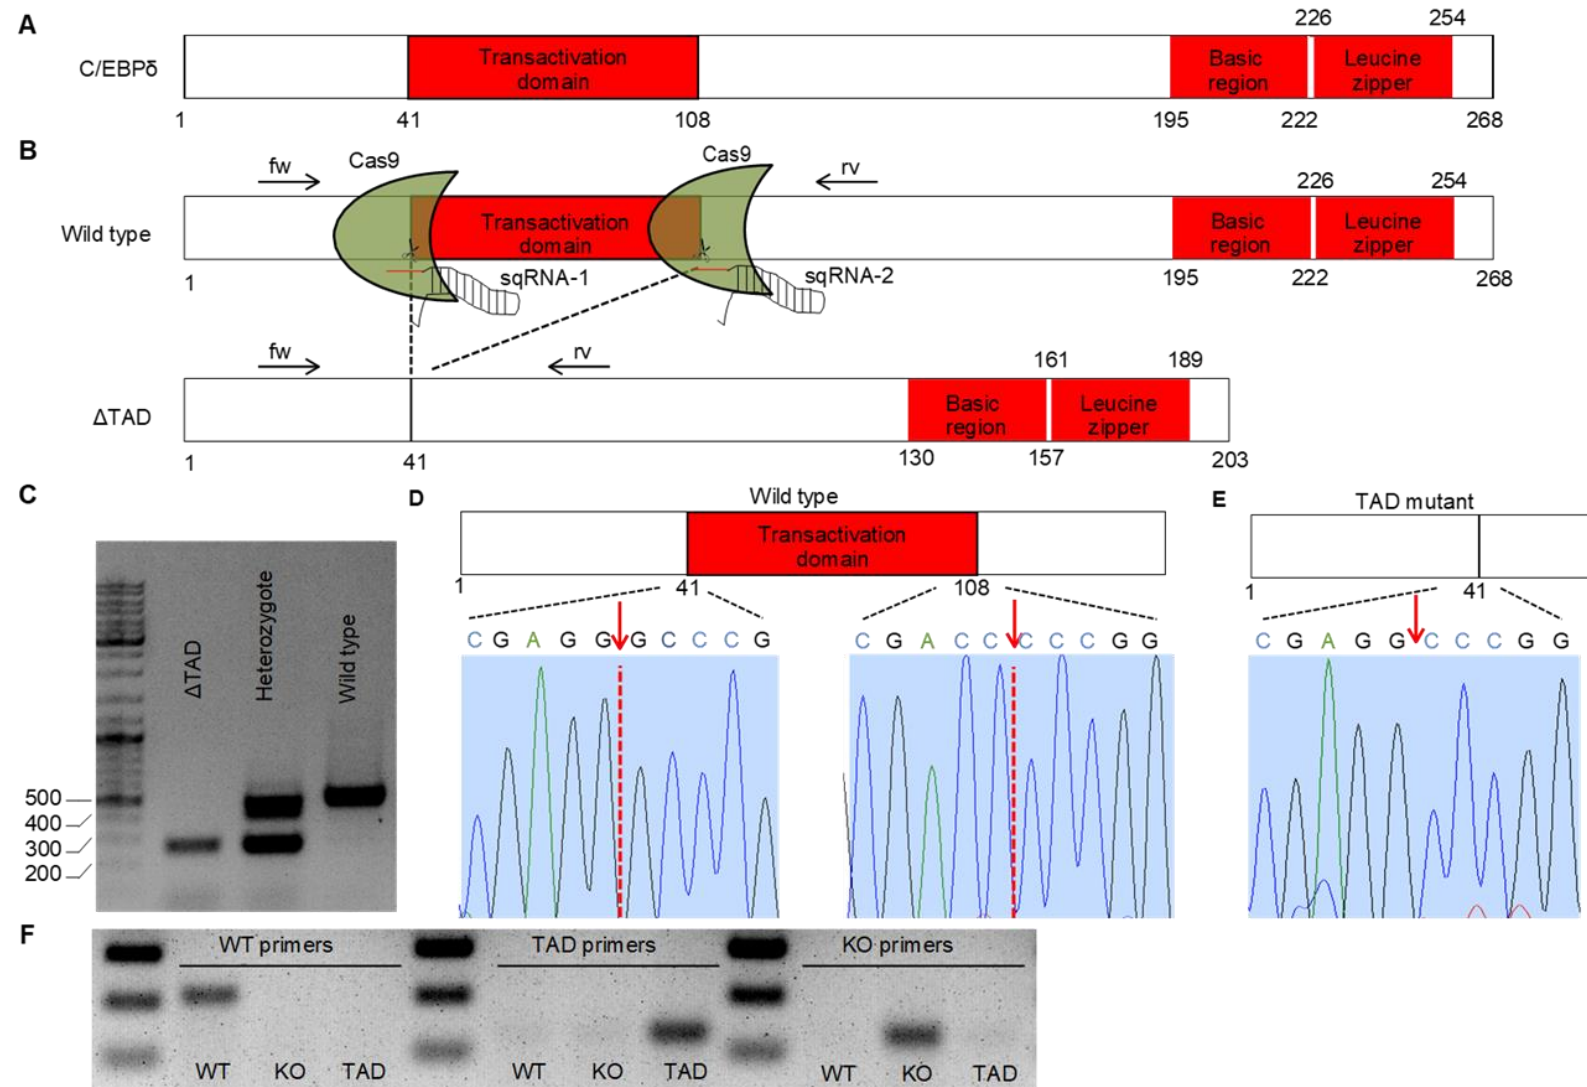

**Figure S1: CRISPR-mediated generation of a C/EBP $\delta$  TAD mutant.** (A) Overview of C/EBP $\delta$  showing the transactivation domain; the basic DNA binding region and the Leucine zipper. (B) Guide RNAs binding to opposite sides of the TAD results in CAS9 dependent deletion of the region between the guides. (C) PCR analysis of DNA isolated from RAW cells after CRISPR-mediated TAD deletion. (D) Sequence analysis of genomic DNA in WT RAW cells or (E)  $\Delta$ TAD cells. The latter cells show an in frame deletion of TAD. (F) RT-PCR (mRNA) analysis of WT; KO and  $\Delta$ TAD cells with WT; TAD or KO specific primers.

Wild type RAW264.7 cells

Genomic DNA

ATGAGCGCCGCGCTTTTTCAGCCTGGACAGCCCGGTGCGGGGCACACCCCTGGCCACAGAACCCGCGGCCTTCTAC  
GAGCCAGGCAGGGTGGACAAGCCCGGCGAGGGCCCGAGCCAGGGGATCTGGGGGAGCTGGGCTCCACGACTOCT  
GCCATGTACGACGACGAGAGCGCCATCGACTTCAGCGCCTACATTGACTCCATGGCCGCGTGGCCACCCCTAGAG  
CTGTGCCACGACGAACTCTTCGCCGACCTCTTCAACAGCAACCACAAAGCGGCGCGCGGGCGGCTGGAGCTG  
CTGCAGGGCGGCCCTACGCGACCCCGGGTGTGGGGTCTGTGCTAGGGGGCGCTCAAGCGCGAAOCCGACTGG  
GGCGACGGCGACGCGCCGGGCTCCCTGCTGCGGGCGCAAGTGGCGGTGTGCGGCGAGACAGTGGTGGCTTGGCG  
GCCGCGGCTCAGCCCACTCCACCCACTTCGCGGAGCCTCCTCGAGGCAGCCCGGGGCGAGCCTCGCGCCCGGC  
ACAGTCCGAGAAAAGGGGCGGGGCAAGAGGGGTCCGGAOCCGCGGCGAGCCCGGAGTACCGGCAGCGGCGAGCGC  
AACAACATCGCTGTGCGCAAGAGCCGCGACAAGGCCAAGCGCGCAACCAGGAGATGCAGCAGAAGCTGGTGGAG  
TTGTGCGCCGAGAACGAGAAGCTGCATCAGCGCGTGGAGCAGCTCACC CGGGACCTGGCTGGCCTCGGCGAGTTC  
TTCAAAAACCTGCCAGCCCGCCTTTCTGCGCCACCGCGCGGCTGCGCGTAA

Protein

MSAALFSLDSFVRGTPWPTEPAAFYEPGRVDKPGRGPEPGDLGELGSTTPAMYDDESAIDFSAYIDSMAAVPTLE  
LCHDELFLADLNSNHKAAGAGGLELLQGGPTRPPGVGSVARGPLKREP DWGDGDAPGSL LPAQVAVCAQT VVSLA  
AAAQPTPPTSPPEPRGSPGPSLAPGTVREKAGKRGPDGRGSPFYRQRRERNNIAVRKSRDKAKRRNQEMQQKLVE  
LSAENEKLHQVEQLTRDLAQLRQFFKKLPSPFFLPPTGADCR

C/EBP $\delta$  knock out RAW264.7 cells, clone 1

Genomic DNA

ATGAGCGCCGCGCTTTTTCAGCCTGGACAGCCCGGTGCGGGGCACACCCCTGGCCACAGAACCCGCGGCCTTCTAC  
GAGCCAGGCAGGGTGGACAAGCCCGGCGAGGGCCCGAGTGTGGGGTCTGTGCTAGGGGGCCGCTCAAGCGCGA  
ACCGACTGGGGCGACGGCGACGCGCCGGGCTCCCTGCTGCGGGCGCAAGTGGCGGTGTGCGCGCAGACAGTGGT  
GAGCTTGGCGGCCCGGGCTCAGCCCACTCCACCCACTTCGCGGAGCCTCCTCGAGGCAGCCCGGGGCGAGCCT  
CGCGCCCGGCACAGTCCGAGAAAAGGGC

Protein

MSAALFSLDSFVRGTPWPTEPAAFYEPGRVDKPGRGPEGVCR

C/EBP $\delta$  knock out RAW264.7 cells, clone 2

Genomic DNA

ATGAGCGCCGCGCTTTTTCAGCCTGGACAGCCCGGTGCGGGGCACACCCCTGGCCACAGAACCCGCGGCCTTCTAC  
GAGCCAGGCAGGGTGGACAAGCCCGGCGAGGGCCCGAGTGTGGGGTCTGTGCTAGGGGGCCGCTCAAGCGCGA  
CCGACTGGGGCGACGGCGACGCGCCGGGCTCCCTGCTGCGGGCGCAAGTGGCGGTGTGCGCGCAGACAGTGGTGA  
GCTTGGCGGCCCGGGCTCAGCCCACTCCACCCACTTCGCGGAGCCTCCTCGAGGCAGCCCGGGGCGAGCCTCG  
CGCCCGGCACAGTCCGAGAAAAGGGC

Protein

MSAALFSLDSFVRGTPWPTEPAAFYEPGRVDKPGRGPEWGLSLGGRSSANPTGATATRRAPCCRRKWRCAARRQW

C/EBP $\delta$   $\Delta$ TAD RAW264.7 cells, clone 1 and 2

Genomic DNA

ATGAGCGCCGCGCTTTTTCAGCCTGGACAGCCCGGTGCGGGGCACACCCCTGGCCACAGAACCCGCGGCCTTCTAC  
GAGCCAGGCAGGGTGGACAAGCCCGGCGAGGGCCCGGGTGTGGGGTCTGTGCTAGGGGGCCGCTCAAGCGCGAA  
CCCGACTGGGGCGACGGCGACGCGCCGGGCTCCCTGCTGCGGGCGCAAGTGGCGGTGTGCGCGCAGACAGTGGTGA  
AGCTTGGCGGCCCGGGCTCAGCCCACTCCACCCACTTCGCGGAGCCTCCTCGAGGCAGCCCGGGGCGAGCCTC  
GCGCCCGGCACAGTCCGAGAAAAGGGCGCGGGCAAGAGGGGTCCGGAOCCGCGGCGAGCCCGGAGTACCGGCAGGG  
CGCGAGCGCAACAACATCGCTGTGCGCAAGAGCCGCGACAAGGCCAAGCGCCGCAACCAGGAGATGCAGCAGAAG  
CTGGTGGAGTTGTGCGCGAGAACGAGAAGCTGCATCAGCGCGTGGAGCAGCTCACC CGGGACCTGGCTGGCCTC  
CGGCAGTTCTTCAAAAACCTGCCAGCCCGCCTTTCTGCGCCACCGGGCGCGGCTGCGCGTAA

Protein

MSAALFSLDSFVRGTPWPTEPAAFYEPGRVDKPGRGPGVGSVARGPLKREP DWGDGDAPGSL LPAQVAVCAQT VV  
SLAAAAQPTPPTSPPEPRGSPGPSLAPGTVREKAGKRGPDGRGSPFYRQRRERNNIAVRKSRDKAKRRNQEMQQK  
LVELSAENEKLHQVEQLTRDLAQLRQFFKKLPSPFFLPPTGADCR

Figure S2: Genomic DNA and protein sequence of wild type, C/EBP $\delta$  knock out and C/EBP $\delta$   $\Delta$ TAD RAW264.7 clones. The transactivation domain is indicated in red in the wild type sequences.

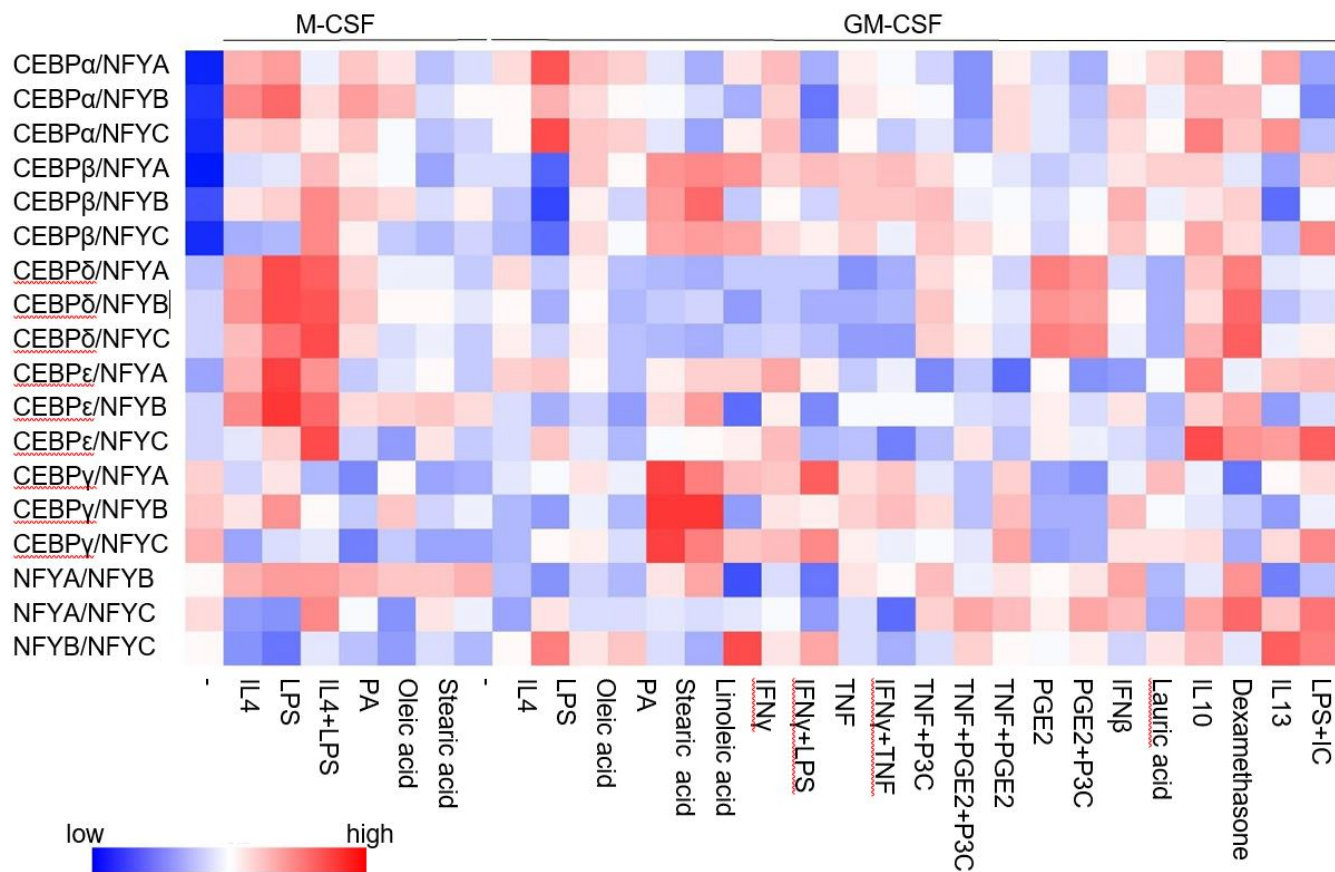

**Figure S3. Relative CEBP and NF-Y family member expression in monocytes and macrophages.** Heatmap of the expression ratio of C/EBP and NF-Y family members in monocytes differentiated and activated with different stimuli (data derived from GSE46903).
